# Supplementary material for: A predictive group-contribution model for the viscosity of aqueous organic aerosol
Source: Copernicus journal article supplement (doi:10.5194/acp-20-2987-2020), 2020-03-12
Supplement: Supplementary file 2 [file acp-20-2987-2020-supplement.zip]

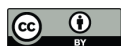

## *Supplement of*

# **A predictive group-contribution model for the viscosity of aqueous organic aerosol**

**Natalie R. Gervasi et al.**

*Correspondence to:* Andreas Zuend (andreas.zuend@mcgill.ca)

- acp-20-2987-2020-supplement-title-page.pdf
- Aqueous Binary Systems
  - 1,2,4-butanetriol+water\_viscosity\_Romero2008@293K.csv
  - 1,2,4-butanetriol+water\_viscosity\_Romero2008@298K.csv
  - 1,2,4-butanetriol+water\_viscosity\_Song2016@293K.csv
  - 1,2,4-butanetriol+water\_viscosity\_Song2016Bulk@293K.csv
  - 1,2,6-hexanetriol+water\_viscosity\_Song2016@293K.csv
  - 1,4-butanediol+water\_viscosity\_Hawrylak1998@298K.csv
  - 1,4-butanediol+water\_viscosity\_Romero2008@293K.csv
  - 1,4-butanediol+water\_viscosity\_Romero2008@298K.csv
  - 1,4-butanediol+water\_viscosity\_Song2016@293K.csv
  - 1,4-butanediol+water\_viscosity\_Song2016Bulk@293K.csv
  - 1,4-butanediol+water\_viscosity\_Yang2004@293K.csv
  - acetic\_acid+water\_viscosity\_CRCHandbook@293K.csv
  - citric\_acid+water\_viscosity\_CRCHandbook@293K.csv
  - citric\_acid+water\_viscosity\_Laguerie1976@298K.csv
  - citric\_acid+water\_viscosity\_Song2016@293K.csv
  - citric\_acid+water\_viscosity\_Song2016Bulk@293K.csv
  - erythritol+water\_viscosity\_Jiang2013@293K.csv
  - erythritol+water\_viscosity\_Romero2008@293K.csv
  - erythritol+water\_viscosity\_Romero2008@298K.csv
  - erythritol+water\_viscosity\_Song2016@293K.csv
  - erythritol+water\_viscosity\_Zhu2010@293K.csv
  - fructose+water\_viscosity\_CRCHandbook@293K.csv

- fructose+water\_viscosity\_Rampp2000@283K.csv
- fructose+water\_viscosity\_Rampp2000@293K.csv
- fructose+water\_viscosity\_Telis2007@283K.csv
- fructose+water\_viscosity\_Telis2007@293K.csv
- glucose+water\_viscosity\_Forst2002@293K.csv
- glucose+water\_viscosity\_Mazurkiewicz2001@298K.csv
- glucose+water\_viscosity\_Song2016@293K.csv
- glucose+water\_viscosity\_Telis2007@293K.csv
- glutaric\_acid+water\_viscosity\_Chmielewska2007@298K.csv
- glutaric\_acid+water\_viscosity\_Song2016@293K.csv
- glycerol+water\_viscosity\_CRCHandbook@293K.csv
- glycerol+water\_viscosity\_Mazurkiewicz2001@298K.csv
- glycerol+water\_viscosity\_Segur1951@293K.csv
- glycerol+water\_viscosity\_Song2016@293K.csv
- maleic\_acid+water\_viscosity\_Chmielewska2007@298K.csv
- maleic\_acid+water\_viscosity\_Gomez1986@298K.csv
- maleic\_acid+water\_viscosity\_Song2016@293K.csv
- maltose+water\_viscosity\_Song2016@293K.csv
- maltose+water\_viscosity\_Ueada1969@298K.csv
- raffinose+water\_viscosity\_Song2016@293K.csv
- sorbitol+water\_viscosity\_Song2016@293K.csv
- sorbitol+water\_viscosity\_Zhu2010@293K.csv
- sucrose+water\_viscosity\_CRCHandbook@293K.csv
- sucrose+water\_viscosity\_Forst2002@293K.csv
- sucrose+water\_viscosity\_Mazurkiewicz2001@298K.csv
- sucrose+water\_viscosity\_Power2013@293K.csv
- sucrose+water\_viscosity\_Quintas2006@293K.csv
- sucrose+water\_viscosity\_Song2016@293K.csv
- sucrose+water\_viscosity\_Swindells1958@293K.csv
- sucrose+water\_viscosity\_Telis2007@293K.csv
- trehalose+water\_viscosity\_Magazu1999@293K.csv
- trehalose+water\_viscosity\_Miller1997@293K.csv
- trehalose+water\_viscosity\_Miller1999@293K.csv
- trehalose+water\_viscosity\_Rampp2000@293K.csv
- trehalose+water\_viscosity\_Song2016@293K.csv

- Aqueous Multicomponent Systems

- nd\_1351\_Water+sucrose+citric\_acid\_295K\_Marsh2018DCIC-0100.txt
- nd\_1351\_Water+sucrose+citric\_acid\_295K\_Marsh2018DCIC-4060.txt
- nd\_1351\_Water+sucrose+citric\_acid\_295K\_Marsh2018DCIC-6040.txt
- nd\_1351\_Water+sucrose+citric\_acid\_295K\_Marsh2018DCIC-8020.txt
- nd\_1351\_Water+sucrose+citric\_acid\_295K\_Marsh2018HOT-6040.txt

- nd\_1351\_Water+sucrose+citric\_acid\_295K\_Power2013HOT-1000.txt
- nd\_1351\_Water+sucrose+citric\_acid\_295K\_Rovelli2019HOT-4060.txt
- nd\_1351\_Water+sucrose+citric\_acid\_295K\_Rovelli2019HOT-8020.txt
- nd\_1351\_Water+sucrose+citric\_acid\_295K\_Song2016Bulk-0100.txt
- nd\_1351\_Water+sucrose+citric\_acid\_295K\_Song2016HOT-0100.txt
- nd\_1351\_Water+sucrose+citric\_acid\_295K\_Song2016HOT-1000.txt
- nd\_1352\_Water+sucrose+maleic\_acid\_293K\_Marshall2016HOT.txt

- Aqueous SOA Systems

- nd\_1336\_Water+CAPPA\_SOA\_293K\_Cappa2008.txt
- nd\_1345\_Water+aPinene\_SOA\_293K\_Abramson2013.txt
- nd\_1345\_Water+aPinene\_SOA\_293K\_Pajunoja2014.txt
- nd\_1345\_Water+aPinene\_SOA\_293K\_Zhang2015.txt
- nd\_1345\_Water+aPinene\_SOA\_294K\_Grayson2016@121ugm-3.txt
- nd\_1345\_Water+aPinene\_SOA\_294K\_Grayson2016@520ugm-3.txt
- nd\_1345\_Water+aPinene\_SOA\_294K\_Renbaum-Wolff2013@liquid.txt
- nd\_1345\_Water+aPinene\_SOA\_294K\_Renbaum-Wolff2013@semisolid.txt
- nd\_1345\_Water+aPinene\_SOA\_297K\_Kidd2014.txt
- nd\_1345\_Water+aPinene\_SOA\_298K\_Bateman2015.txt
- nd\_1347\_Water+toluene\_SOA\_295K\_Song2016@liquidsemisolid.txt
- nd\_1347\_Water+toluene\_SOA\_295K\_Song2016@solid.txt
- nd\_1349\_Water+isoprene\_SOA\_295K\_Song2015@liquid.txt
- nd\_1349\_Water+isoprene\_SOA\_295K\_Song2015@semisolid.txt

- Supplement-acp-2019-699.pdf

The copyright of individual parts of the supplement might differ from the CC BY 4.0 License.
